# Supplementary material for: Dynamic Changes in pStat3 Are Involved in Meiotic Spindle Assembly in Mouse Oocytes
Source: MDPI journal article supplement (doi:10.3390/ijms21041220), 2020-02-12
Supplement: s1 [file s1]

Figure S1: pStat3 localizes at the centrosome in various mammalian somatic cells.

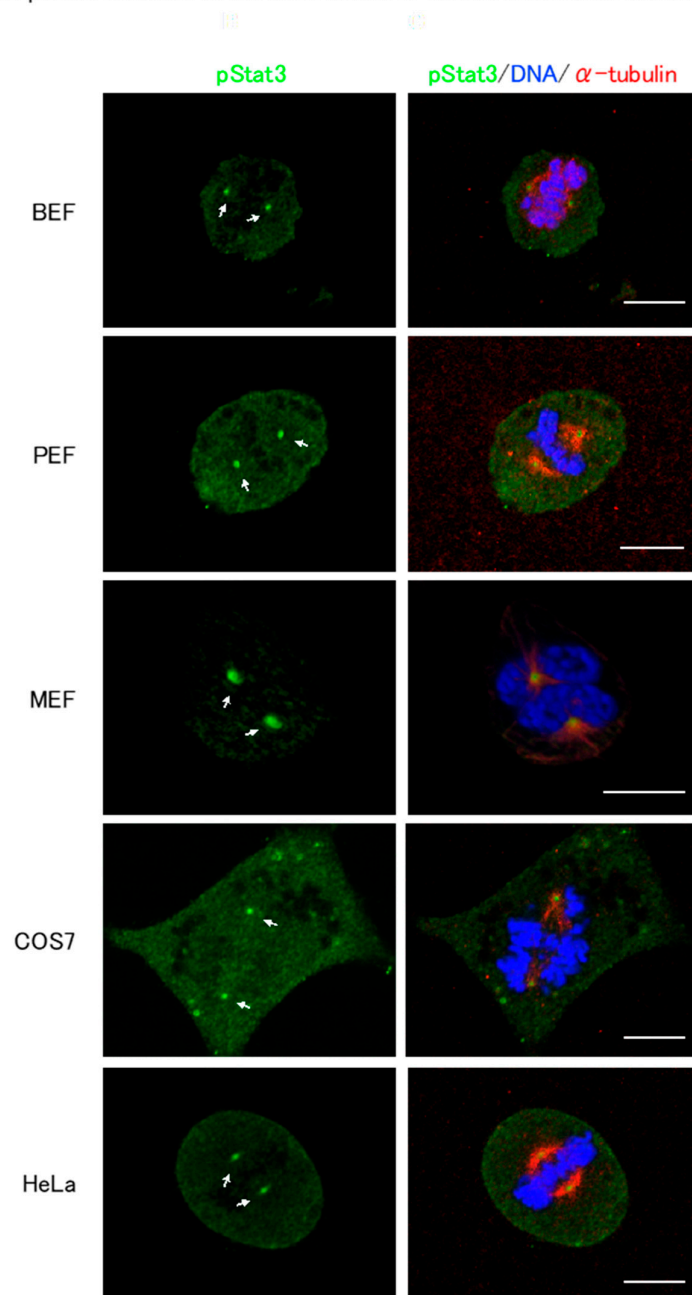

**Figure S1.** pStat3 localizes at the centrosome (arrows) in various mammalian somatic cells. BEF: primary bovine embryonic fibroblasts. PEF: primary porcine embryonic fibroblasts. MEF: primary mouse embryonic fibroblasts. Scale bars: 10  $\mu$ m.
